# Supplementary material for: A Substrate Mimic Allows High-Throughput Assay of the FabA Protein and Consequently the Identification of a Novel Inhibitor of Pseudomonas aeruginosa FabA
Source: PubMed Central journal article supplement (PMC4840175; doi:10.1016/j.jmb.2015.10.027), 2016-01-16
Supplement: mmc1.pdf [file mmc1.pdf]

## Supporting Figures

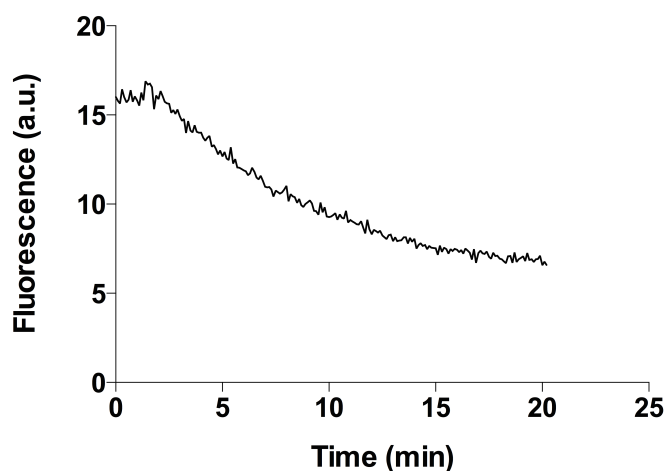

**Supporting Figure S1.** *PaFabI* (*PaFabV* isozyme) shows activity (consumption of NADH monitored by fluorescence) with (*E*)-2-decenoyl-NAC suggesting that it could be assayed by the same procedure as *PaFabV*. The fluorescence assay was carried out in a 150  $\mu$ l fluorescence cuvette prepared with a pre-reaction mixture containing 50 mM Tris pH 7.5, 250 NADH and 118 nM of the *PaFabI*. The reaction was started by addition of 0.2 mM of (*E*)-2-decenoyl-NAC and the decrease of the NADH monitored using an excitation wavelength of 376 nm and emission wavelength of 462 nm.

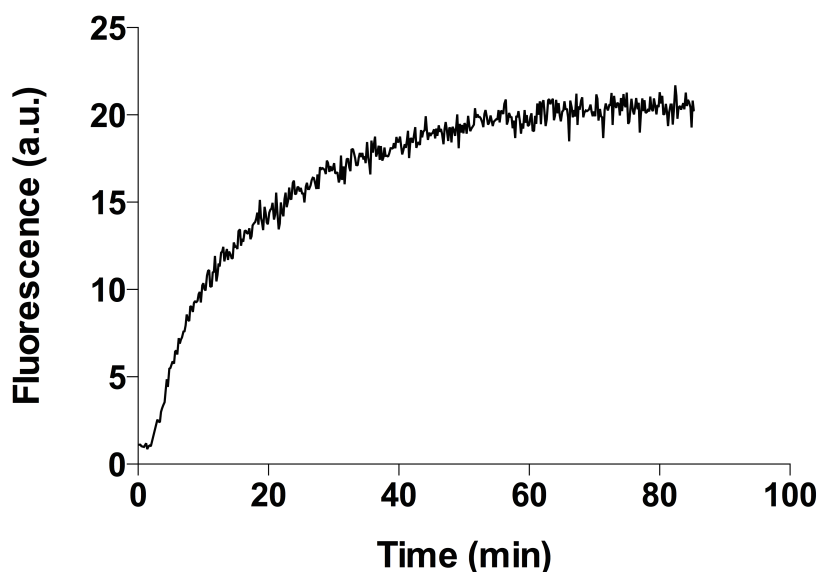

**Supporting Figure S2.** In the coupled *PaFabG-PaFabA* assay with (*E*)-2-decenoyl-NAC we detected activity, the production of NADPH by measuring fluorescence. The reaction is the reverse of the normal direction of the FASII cycle. We were unable to demonstrate that *PaFabA* was rate limiting. The fluorescence assay was carried out in a 150  $\mu$ l fluorescence cuvette prepared with a pre-reaction mixture containing 50 mM Sodium Phosphate pH 7.5, 1mM NADP and 133 nM of the *PaFabA* and 3  $\mu$ M of *PaFabG*. The reaction was started by addition of 0.1 mM of (*E*)-2-decenoyl-NAC and the increase of the NADPH monitored using an excitation wavelength of 340 nm and emission wavelength of 455 nm.

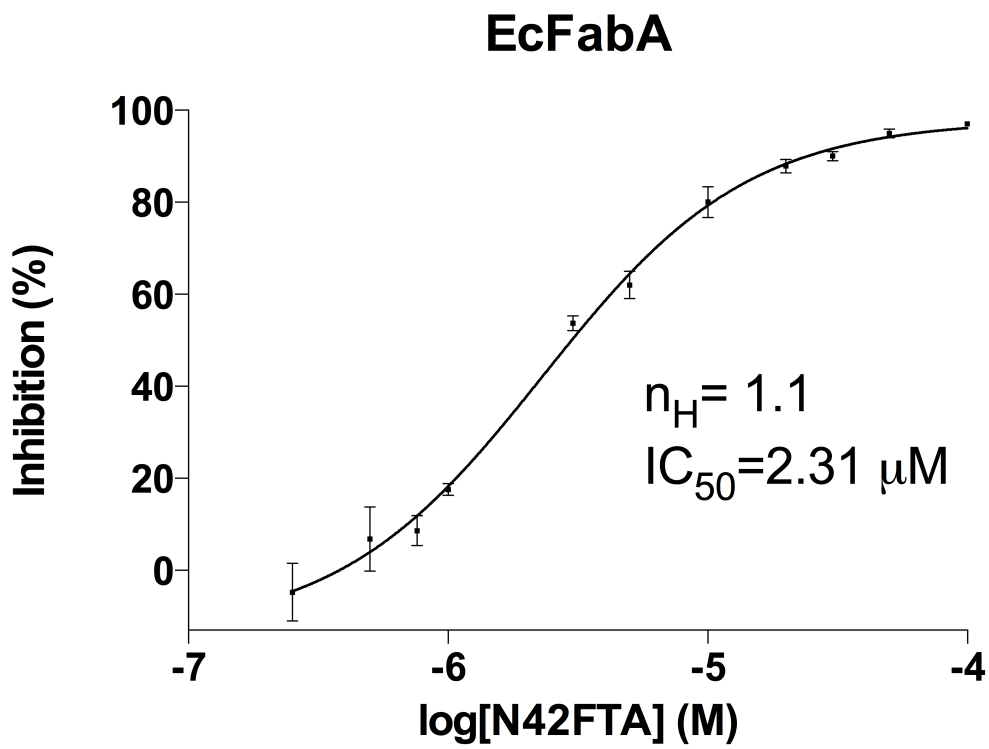

**Supporting Figure S3.** Inhibition of *EcFabA* with N42FTA using the same UV assay as Figure 2C, reveals an  $IC_{50}$  of 2.31  $\mu M$  almost identical to that measured for *PaFabA* of 3.2  $\mu M$ .

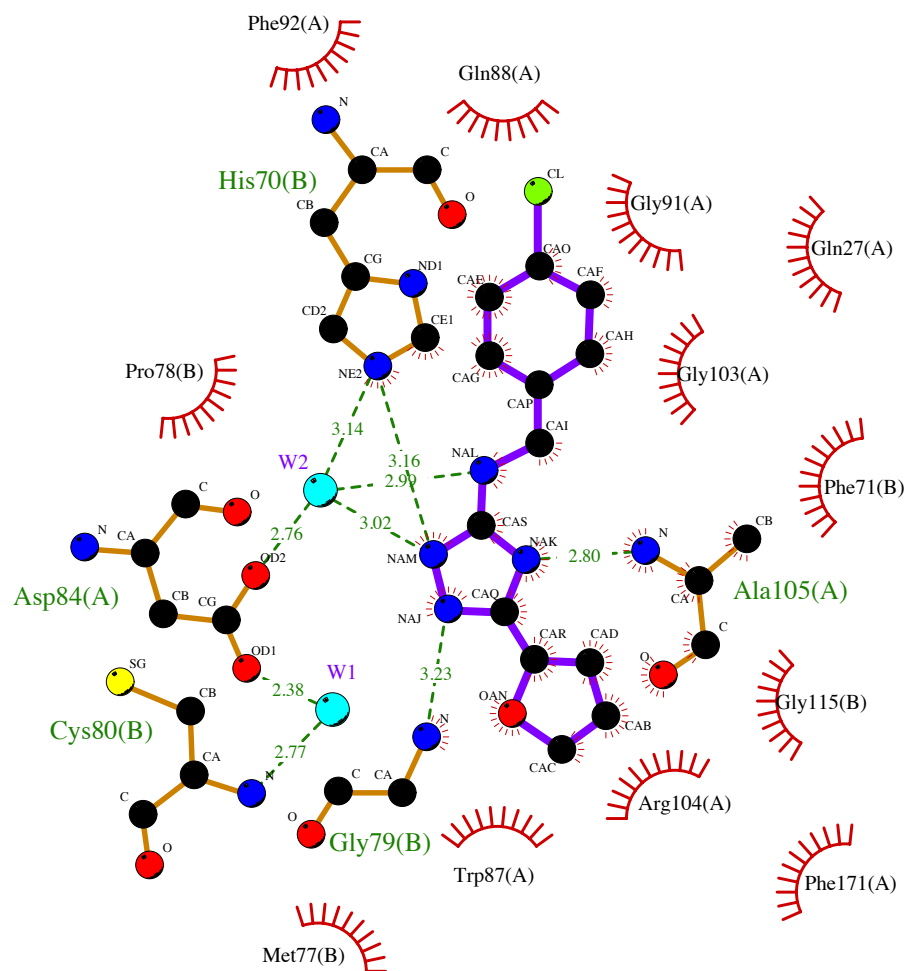

**Supporting Figure S4.** A Ligplot diagram of N42FTA bound to *PaFabA*.

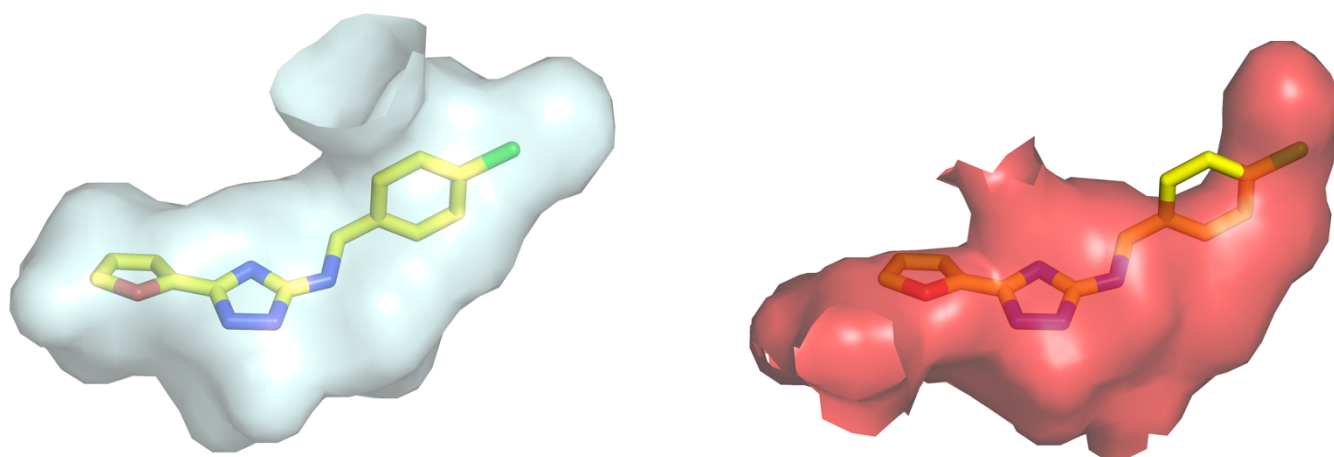

**Supporting Figure S5.** N42FTA shown in the hydrophobic tunnel of *PaFabA* (light blue) and *PaFabZ* (red) reveals the compound is unlikely to bind to *PaFabZ*.
